# Supplementary material
Source: PubMed Central journal article supplement (PMC11105247)
Supplement: 18_2018_2791_MOESM1_ESM.pdf [file 18_2018_2791_MOESM1_ESM.pdf]

***In Vivo* Regulation of the A Disintegrin And Metalloproteinase 10  
(ADAM10) by the Tetraspanin 15**

**Supplementary Material**

Lisa Seipold<sup>1</sup>, Hermann Altmeyen<sup>2</sup>, **Tomas Koudelka<sup>3</sup>, Andreas Tholey<sup>3</sup>**, Petr Kasperek<sup>4</sup>, Radislav Sedlacek<sup>4</sup>, Michaela Schweizer<sup>5</sup>, Julia Bär<sup>6</sup>, Marina Mikhaylova<sup>6</sup>, Markus Glatzel<sup>2</sup>, and Paul Saftig<sup>1</sup>#

*1: Institute of Biochemistry, Christian Albrechts University Kiel, Olshausenstrasse 40, D-24098 Kiel, Germany*

*2: Institute of Neuropathology, University Medical Center Hamburg-Eppendorf, Martinistraße 52, D-20246 Hamburg, Germany*

*3: Systematic Proteome Research & Bioanalytics, Institute for Experimental Medicine, University of Kiel, Kiel, Germany*

*4: Czech Centre for Phenogenomics and Laboratory of Transgenic Models of Diseases, Division BIOCEV, Institute of Molecular Genetics of the CAS, v. v. i., Vestec, Czech Republic*

*5: Center for Molecular Neurobiology Hamburg (ZMNH), University Medical Center Hamburg-Eppendorf (UKE), Falkenried 94, 20251 Hamburg, Germany*

*6: Center for Molecular Neurobiology Hamburg (ZMNH), Emmy-Noether Group "Neuronal Protein Transport", University Medical Center Hamburg-Eppendorf (UKE), Falkenried 94, 20251 Hamburg, Germany*

*#: to whom correspondence should be addressed*

*E-mail: psaftig@biochem.uni-kiel.de, Tel.: +49-431-8802216, Fax: +49-431-8802238*

## Supplementary figure S1

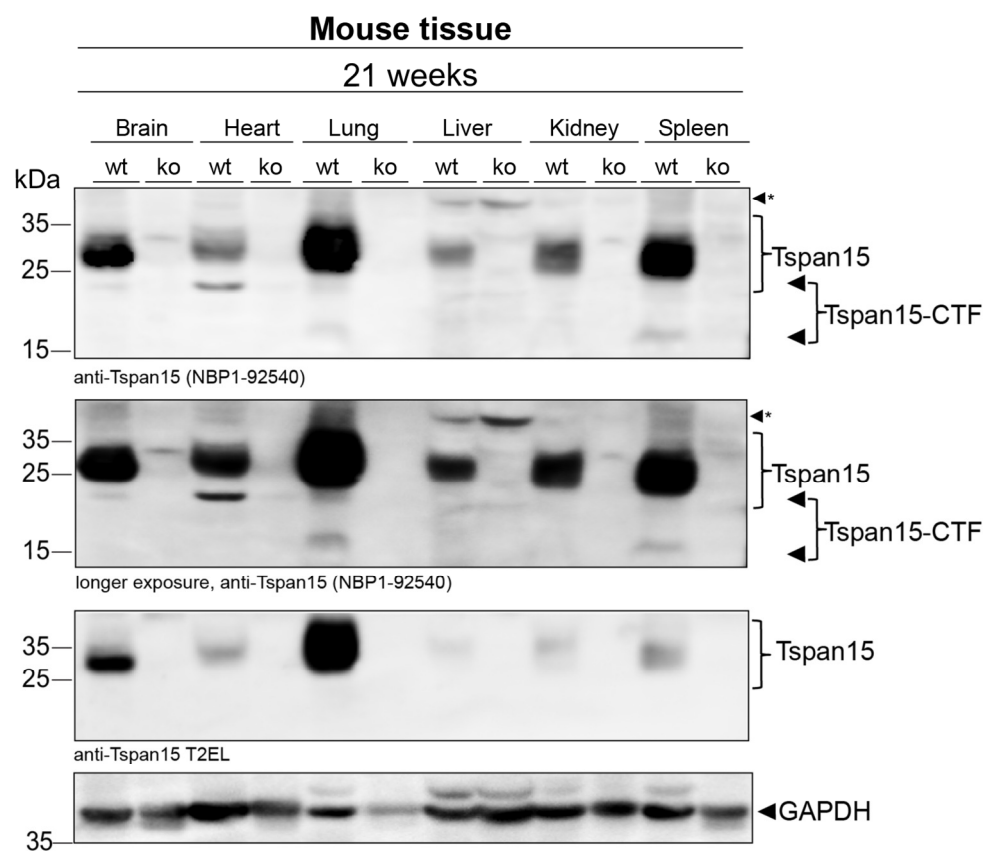

### Figure S1: Expression of Tspan15 in different mouse tissues.

Tspan15 expression was analysed in indicated organs of a 21-week-old wild-type and a Tspan15 knockout (ko) mouse. Using a commercial C-terminal Tspan15 antibody (NBP1-92540) Tspan15 expression was detected in all tested wild-type tissues, but not in the respective knockout samples, confirming specificity of the Tspan15 antibody. After a longer exposure time, additional signals at a molecular weight of 18-20 kDa were observed in wild-type brain, heart, lung and spleen, but not in the respective knockout controls and likely correspond to a Tspan15 carboxyterminal fragment (CTF). Similar to the commercial Tspan15 antibody (NBP1-92540), staining with our self-made Tspan15 antibody T2EL showed specific signals in all tested wild-type tissues, but not in the respective knockout samples. Light signals, likely corresponding to a Tspan15-CTF were observed in brain and heart. Protein loading was controlled by anti-GAPDH staining.

## Supplementary figure S2

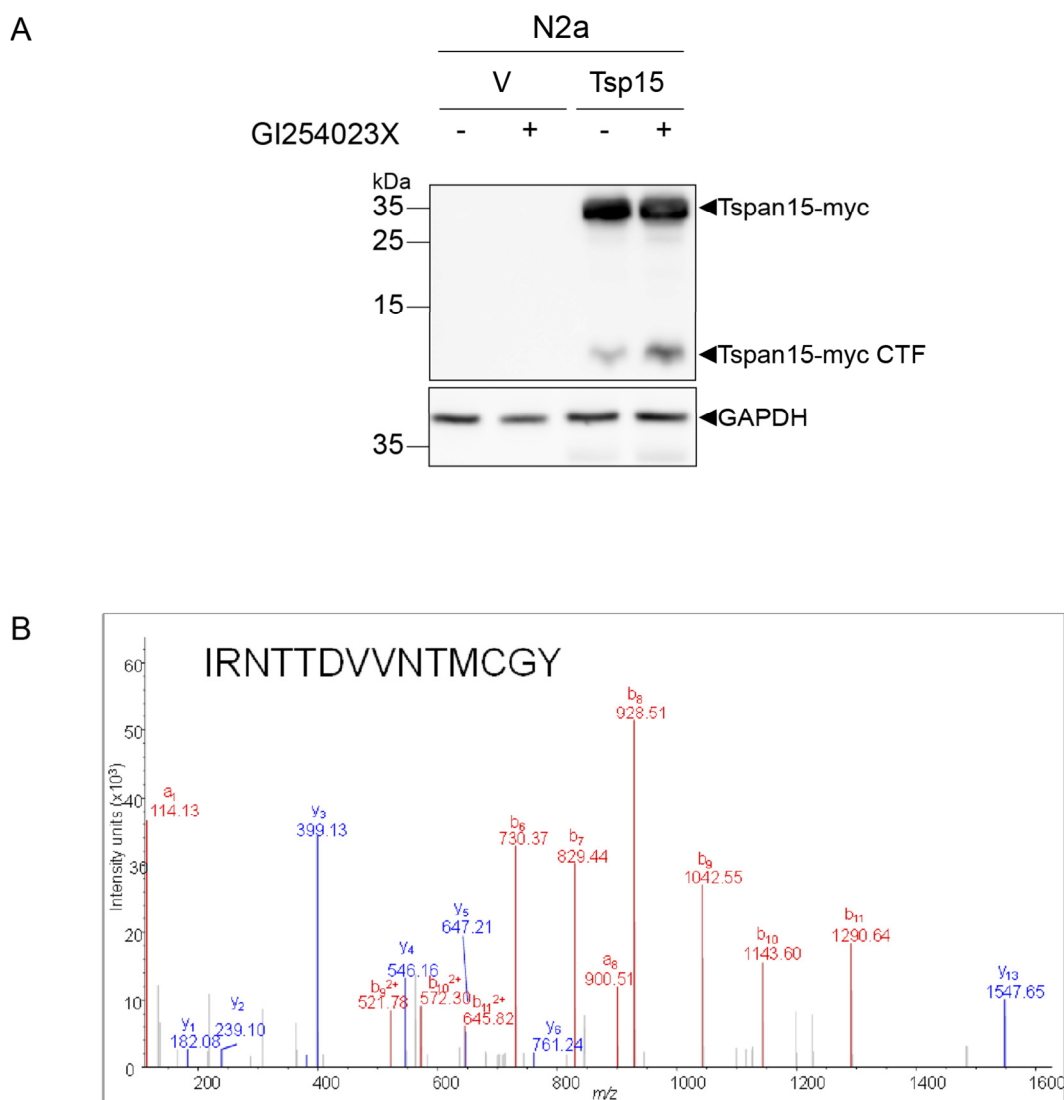

**Figure S2: A) ADAM10 inhibition increases the appearance of the Tspan15 CTF in N2a cells.** N2a Cells were transfected with a murine, myc-tagged Tspan15 (Tsp15) expression construct or an empty vector (V). Before harvesting, the cells were treated with 3  $\mu$ M of the selective ADAM10 inhibitor GI254023X (+) or equal amounts of DMSO as control (-) for 24 h. After immunoblotting, Tspan15-myc and the Tspan15 carboxyterminal fragment (CTF) were observed in transfected cells. Application of the ADAM10 inhibitor did not reduce, but rather increased the appearance of the Tspan15 CTF. **B) MS/MS spectra of the peptide C.IRNTTDVVNTMCGY with a  $m/z$  of 844.8848 ( $[M+2H]^{2+}$ ).** The mass of the peptide corresponds to a deamidated (0.98402 Da) asparagine residue (N189), a carbamidomethylated (57.02146 Da) cysteine residue, an oxidated (15.99492 Da) methionine residue and a dimethylated N-terminus.

### Supplementary figure S3

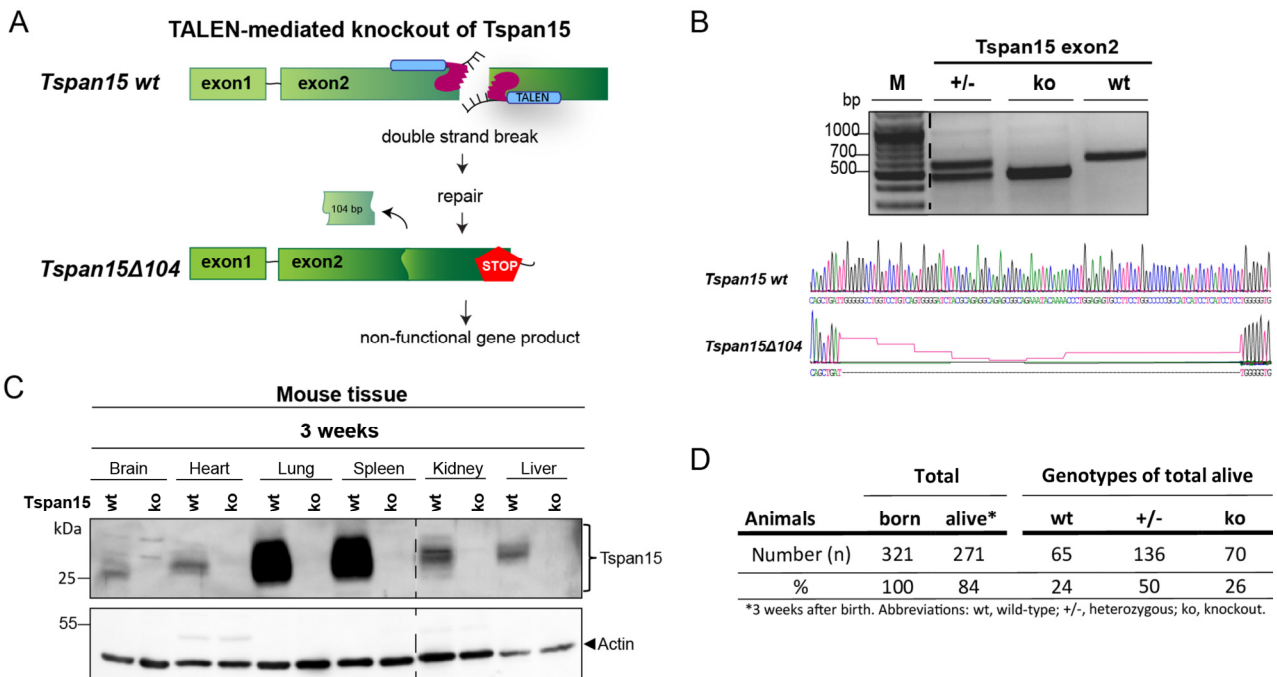

**Figure S3: Generation of *Tspan15*-deficient mice.** **A)** Schematic drawing showing the Transcription Activator-Like Effector Nuclease (TALEN)-mediated knockout strategy for the generation of *Tspan15*-deficient mice. TALENs were designed to induce a site-specific double strand break within exon2 of the *tspan15* gene locus. Subsequent DNA repair led to a 104-base pair (bp) deletion mutation (*Tspan15*Δ104), which generated a premature translational stop codon at the end of *Tspan15* exon2. **B)** Agarose gel electrophoresis of PCR products amplified from genomic DNA obtained from *Tspan15* heterozygous (+/-), knockout (ko) and wild-type (wt) littermate mice using a primer pair (forward and reverse) surrounding the sequence of *Tspan15* exon2. Sequencing chromatogram of the TALEN-targeted region within the wild-type (*Tspan15* wt) and mutated *Tspan15* exon2 (*Tspan15*Δ104). **C)** Immunoblot analysis of *Tspan15* knockout efficiency in indicated organs. Tissue lysates of a wild-type (wt) and a *Tspan15* knockout (ko) mouse were prepared and subjected to immunoblot analysis. Using an anti-*Tspan15* (NBPI-92540) antibody, endogenous *Tspan15* was detected in all wild-type tissues. No *Tspan15*-specific signal was observed in the respective knockout samples. **D)** Table showing the calculated survival rate and genotype distribution resulting from the *Tspan15*Δ104 breeding.



**Supplementary figure S4:**

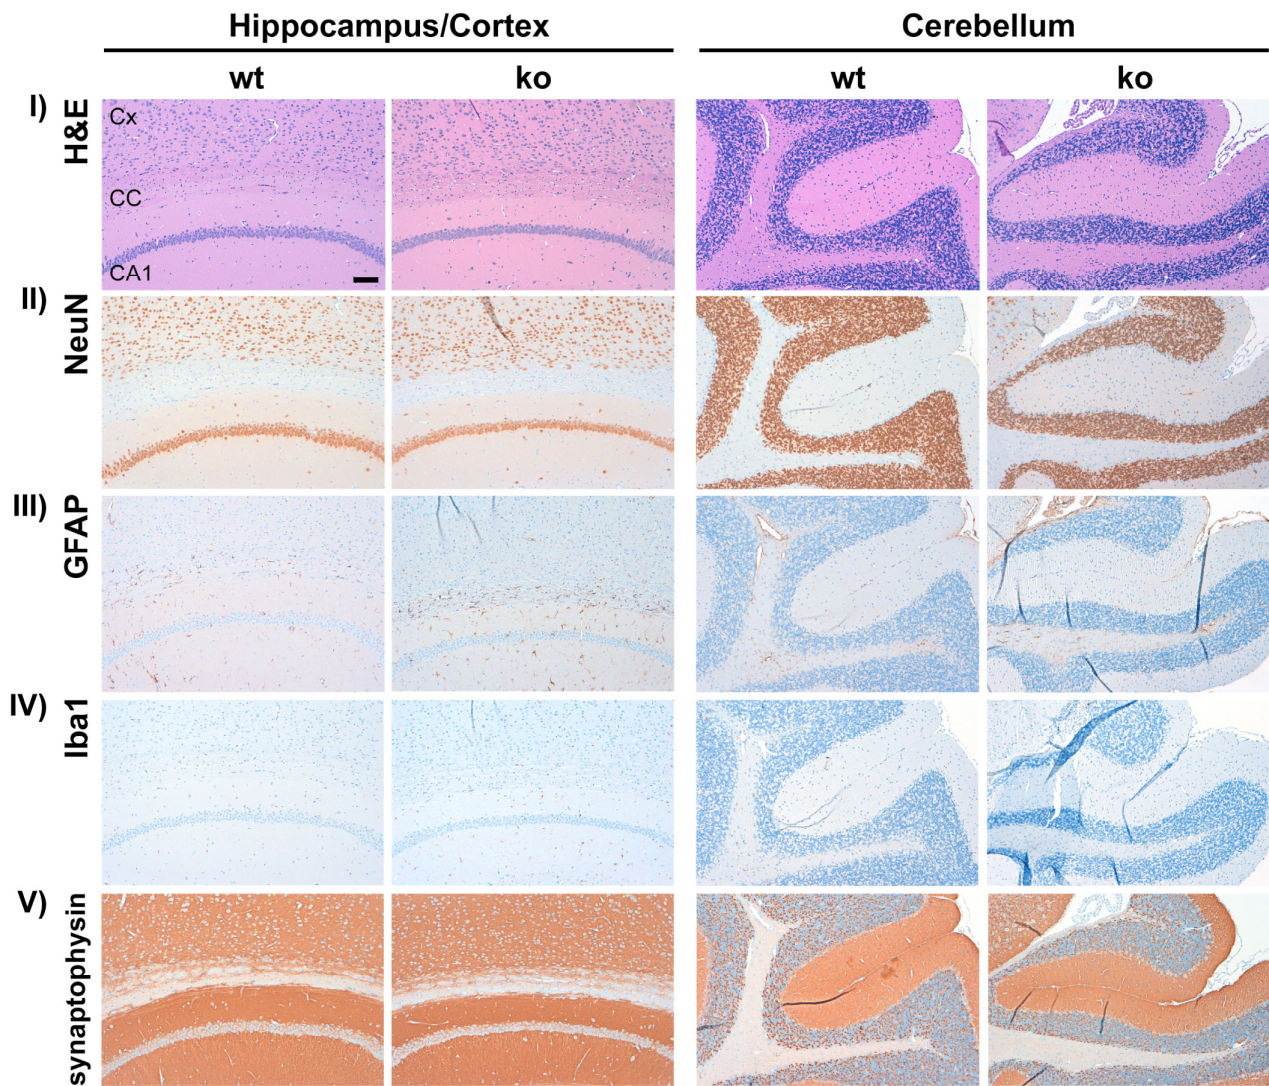

**Figure S4: Histological analysis of the hippocampus in *Tspan15*-deficient mice.** Representative IHC stainings of the hippocampal/cortex region and the cerebellum of three wild-type (wt) and *Tspan15* knockout (ko) mice **I**) Hematoxylin and eosin (H&E) staining. **II-V**) Diaminobenzidine (DAB) staining of the neuronal nuclei antigen (NeuN, II), the glial fibrillary acidic protein (GFAP, III), the astroglia-specific protein ionized calcium binding adaptor molecule 1 (Iba1, IV) and Synaptophysin (V). Cx: cortex; CC: corpus callosum; CA1: CA1 layer of the hippocampus; Scale bar represents 100  $\mu$ m.

**Supplementary figure S5:**

**40-weeks-old mice**

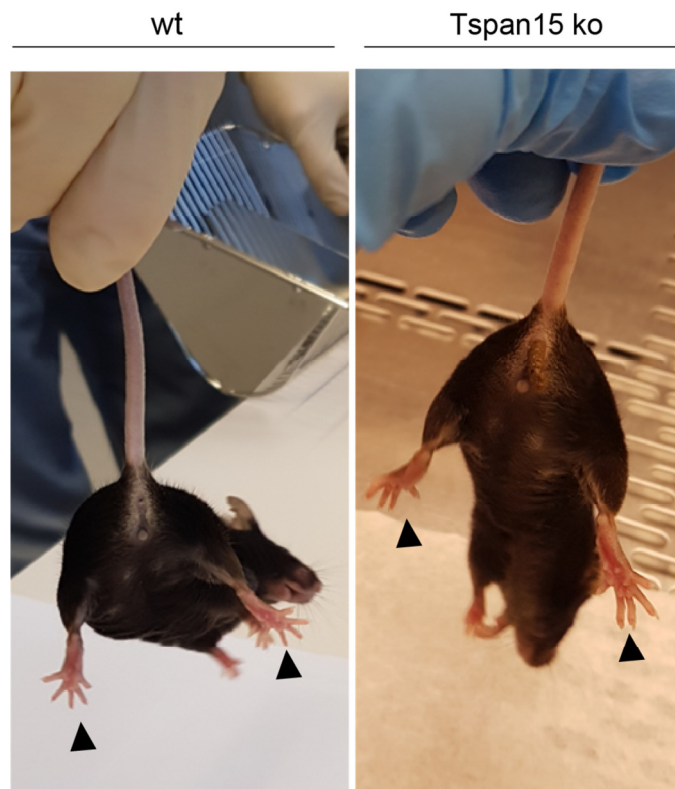

**Figure S5: Tspan15 knockout mice do not show signs of a neurological phenotype. Hind limb clasping was analyzed in 10-month-old wild-type and Tspan15 knockout (ko) mice.**

### **Supplementary table S1:**

**Table S1: Demographics of control and Alzheimer's disease patient samples.**

| Type | sample number | Age at death (years) | Gender | CERAD | Braak |
|------|---------------|----------------------|--------|-------|-------|
| Ctrl | 1             | 68                   | m      | /     | /     |
|      | 2             | 68                   | m      | /     | /     |
|      | 3             | 68                   | f      | /     | /     |
|      | 4             | 63                   | m      | /     | /     |
|      | 5             | 86                   | m      | /     | /     |
| AD   | 6             | 69                   | m      | C     | 4-5   |
|      | 7             | 88                   | m      | C     | 4-5   |
|      | 8             | 74                   | m      | C     | 3-4   |
|      | 9             | 79                   | m      | B     | 5     |
|      | 10            | 63                   | m      | C     | 4-5   |
|      | 11            | 88                   | f      | B     | 4     |

Ctrl: Patients without diagnosed neurodegeneration, AD: Alzheimer's disease patients, f: female, m: male.

### **Supplementary movie legend**

**Video S1: Transport of Tspan15 in dendrites.** Primary hippocampal cultures were transfected with hTspan15-YPET at day in vitro 15, and imaged after 24 h. Images were bleach corrected, slightly adjusted in contrast, and jpg compressed. 20 frames per seconds.
